# Supplementary material for: Li3V2(PO4)3@C core–shell nanocomposite as a superior cathode material for lithium-ion batteries
Source: Royal Society of Chemistry journal article supplement (doi:10.1039/c3nr01617j), 2013-01-01
Supplement: c3nr01617j.pdf [file c3nr01617j.pdf]

# Electronic Supplementary Information (ESI)

## **Li<sub>3</sub>V<sub>2</sub>(PO<sub>4</sub>)<sub>3</sub>@C Core-shell nanocomposite as a superior cathode material for lithium-ion batteries**

<sup>1</sup>Key Laboratory of Advanced Energy Materials Chemistry (Ministry of Education), College of Chemistry, <sup>2</sup>The Co-Innovation Center of Chemistry and Chemical Engineering of Tianjin, Nankai University, Tianjin, 300071, P. R. China  
Fax: +86-22-23509571; Tel: +86-22-23506808; E-mail:chenabc@nankai.edu.cn

### Contents

1. **Fig. S1** XRD profiles of N-LVP and M-LVP.
2. **Fig. S2** SEM image of M-LVP.
3. **Fig. S3** SEM images of the as-prepared samples with different amount of ascorbic acid and PEG-400.
4. **Fig. S4** Cyclic voltammograms of N-LVP.
5. **Fig. S5** (a) The initial charge/discharge profiles and (b) cycling performance of N-LVP.
6. **Fig. S6** Nyquist plots of N-LVP and M-LVP electrodes in freshly assembled cells.

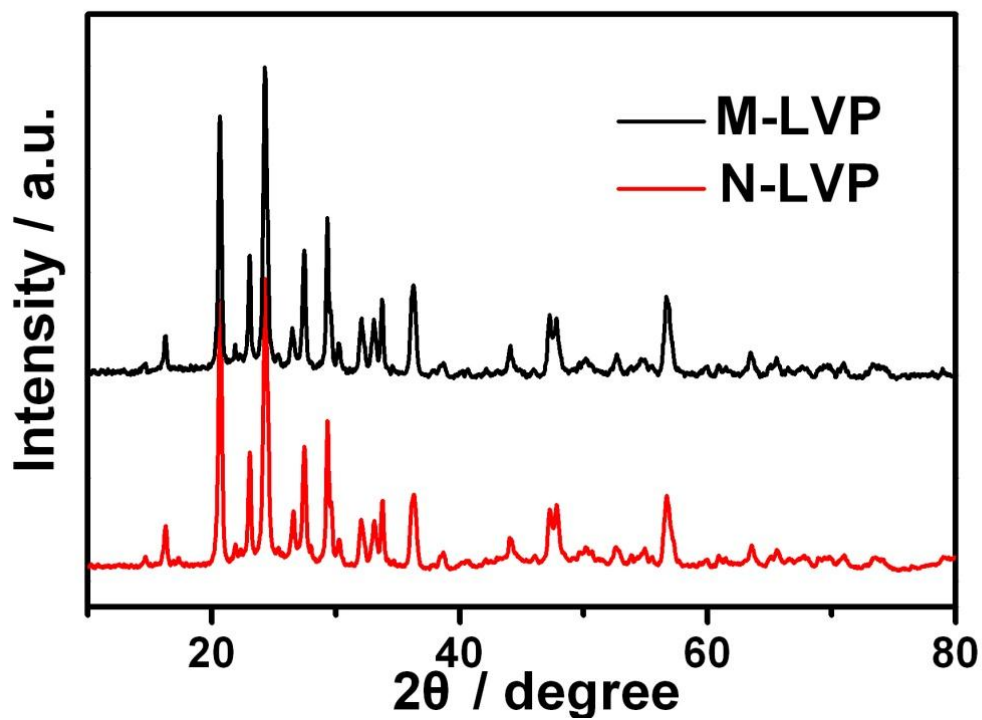

Fig. S1 XRD profiles of N-LVP and M-LVP

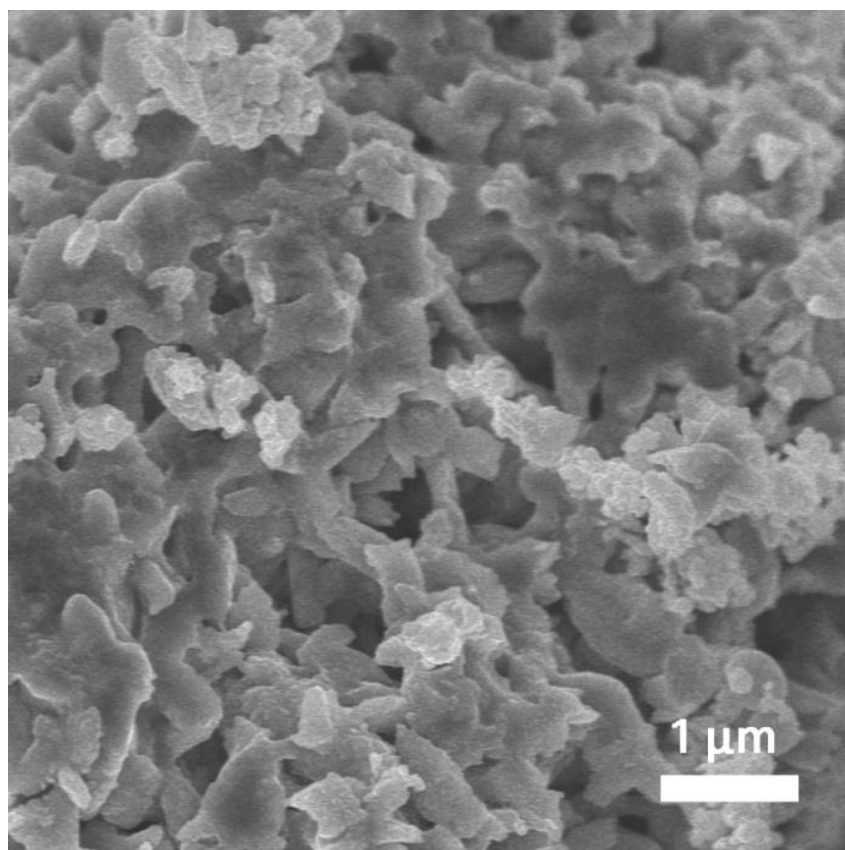

Fig. S2 SEM image of M-LVP

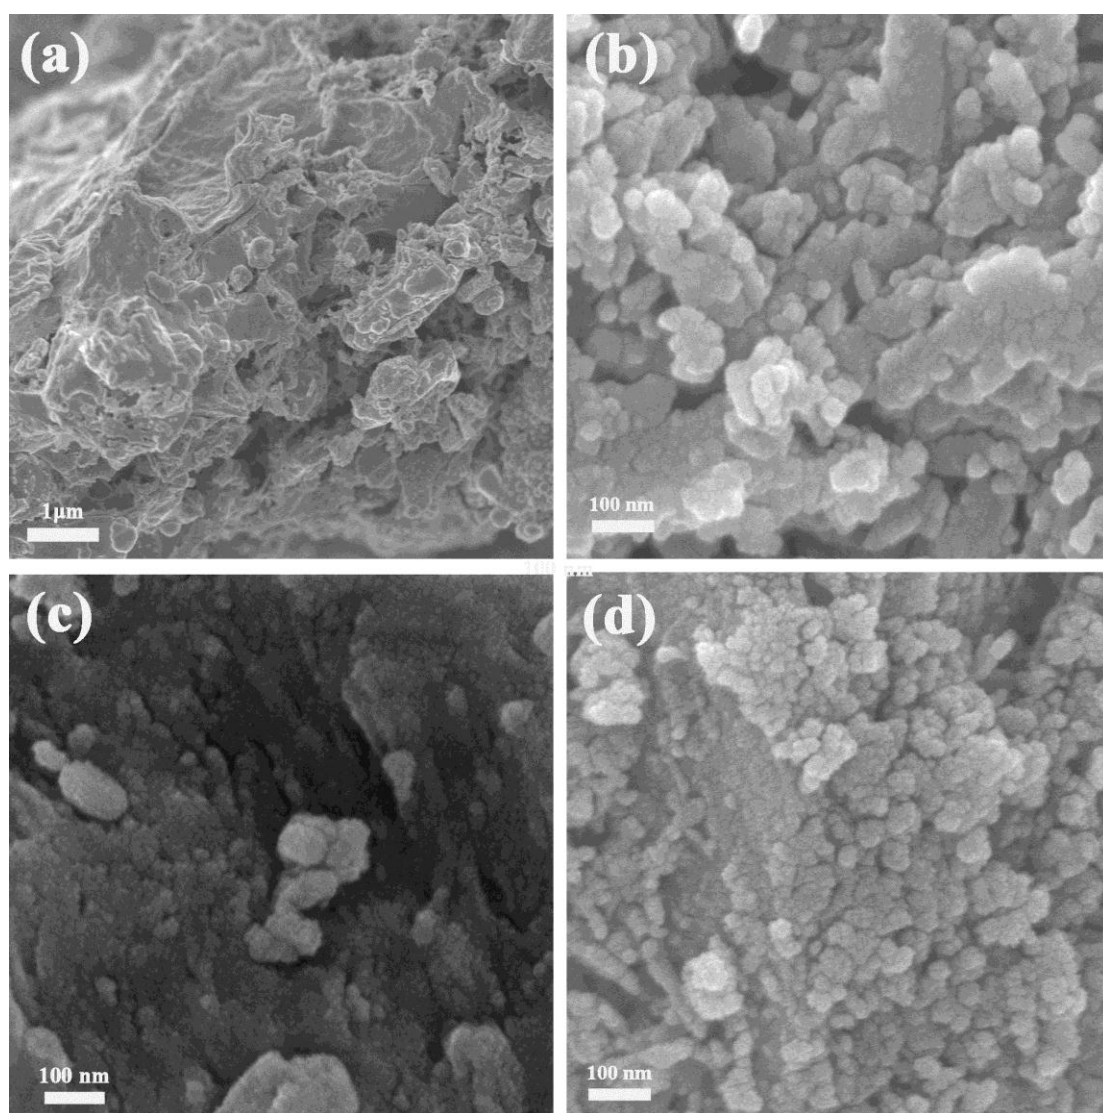

**Fig. S3** SEM images of the as-prepared samples with different amount of ascorbic acid and PEG-400: (a) no ascorbic acid, 3 mL PEG-400; (b) 2 mmol ascorbic acid, 3 mL PEG-400; (c) no PEG-400, 3 mL ascorbic acid; (d) 2 mL PEG-400, 3 mmol ascorbic acid.

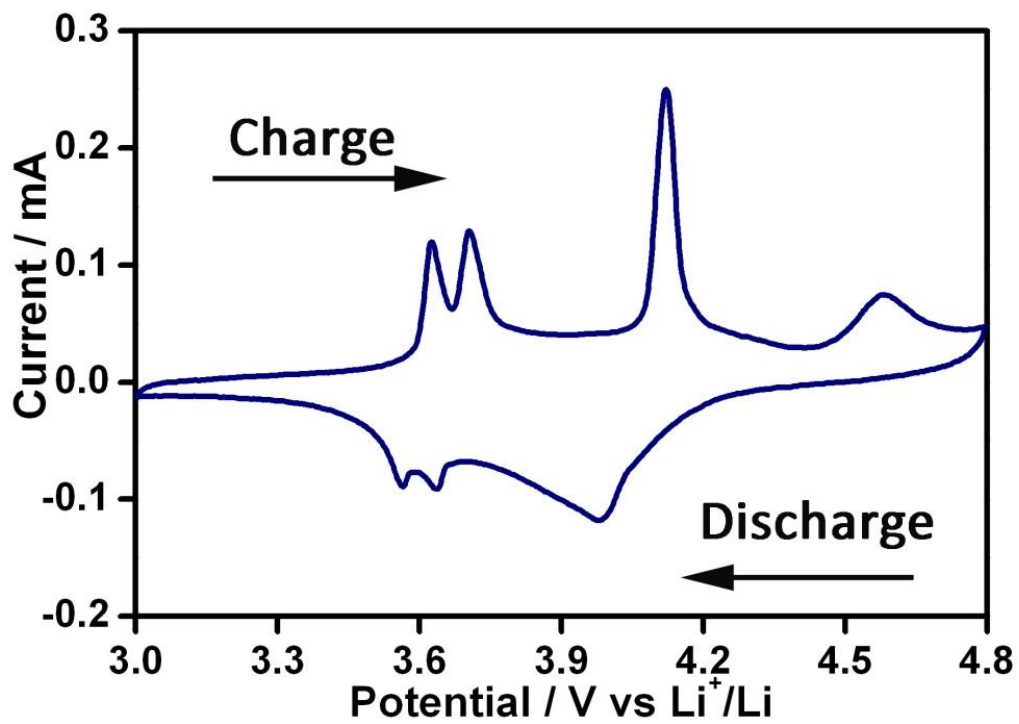

**Fig. S4** Cyclic voltammograms of N-LVP at a scan rate of 0.2 mV/s in the potential range of 3.0–4.8 V.

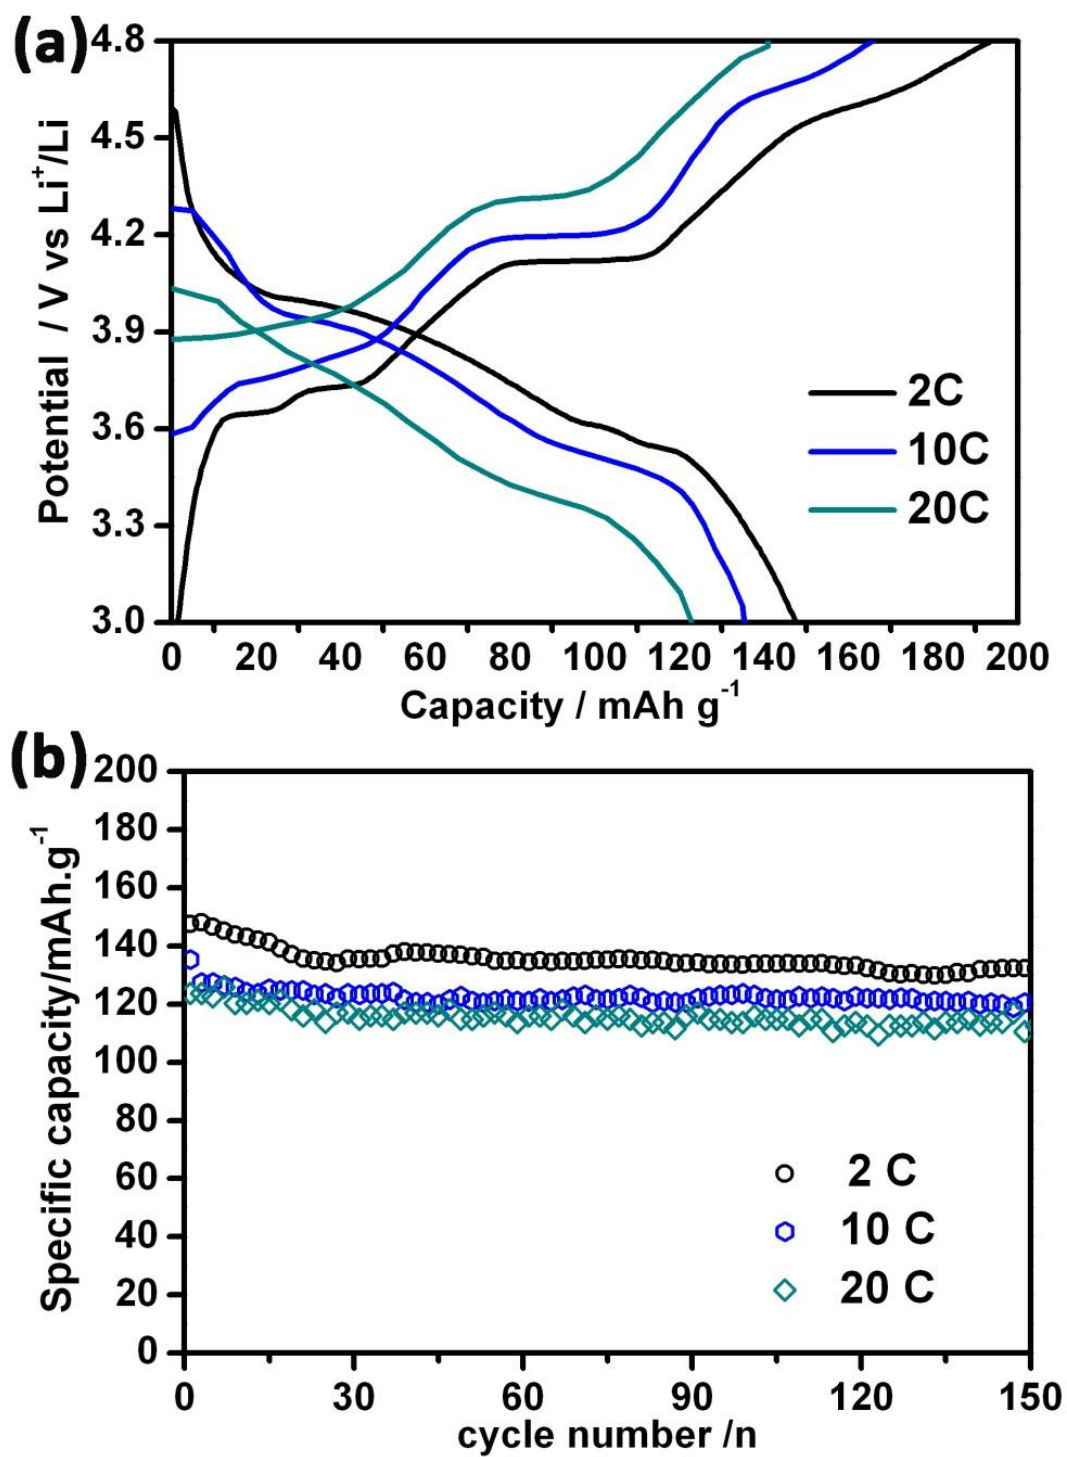

**Fig. S5** (a) The initial charge/discharge profiles and (b) cycling performance of N-LVP at 2 C, 10 C, and 20 C.

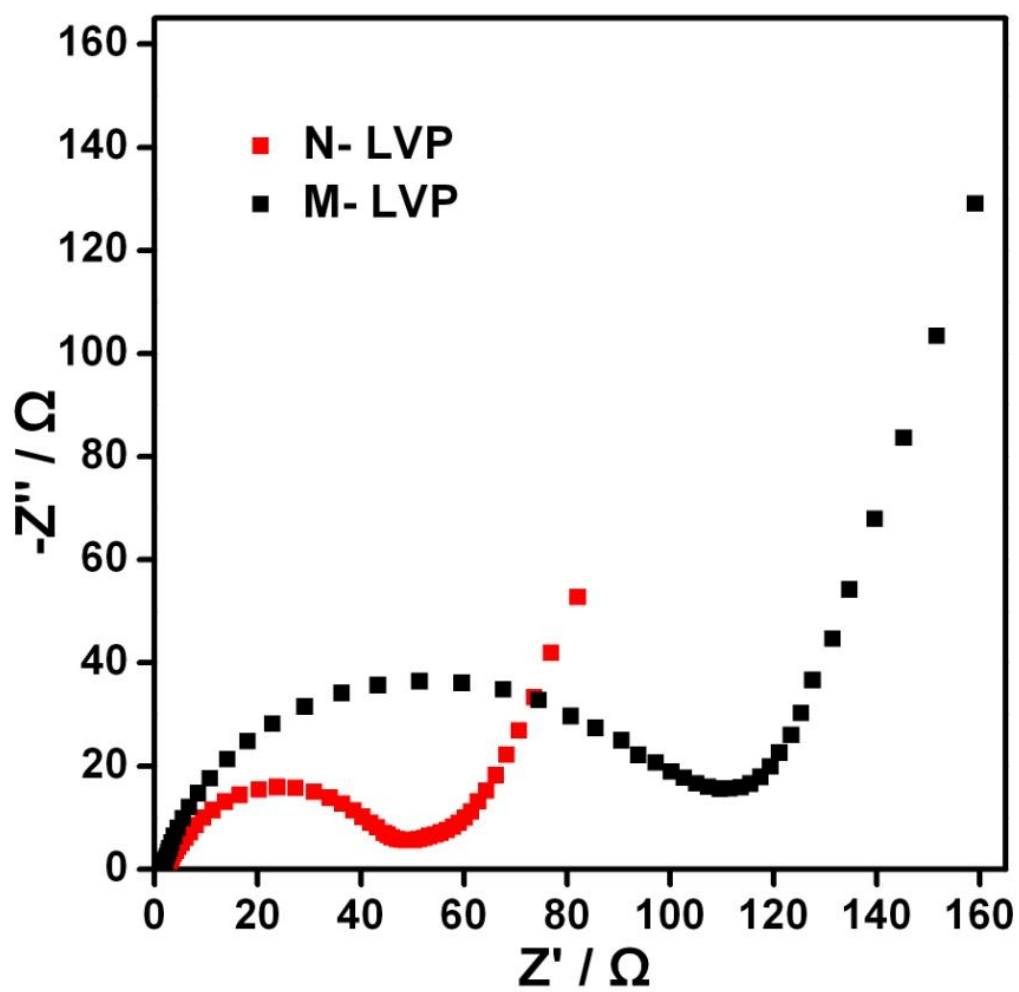

**Fig. S6** Nyquist plots of N-LVP and M-LVP electrodes in freshly assembled cells.
